# Supplementary material for: Genome-Wide Discriminatory Information Patterns of Cytosine DNA Methylation
Source: MDPI journal article supplement (doi:10.3390/ijms17060938), 2016-06-17
Supplement: s1 [file s1]

**Figure S1.** Heatmap of  $I_R$  for CG methylation context in chromosomes 1, built for the 151 *Arabidopsis thaliana* ecotypes [14].

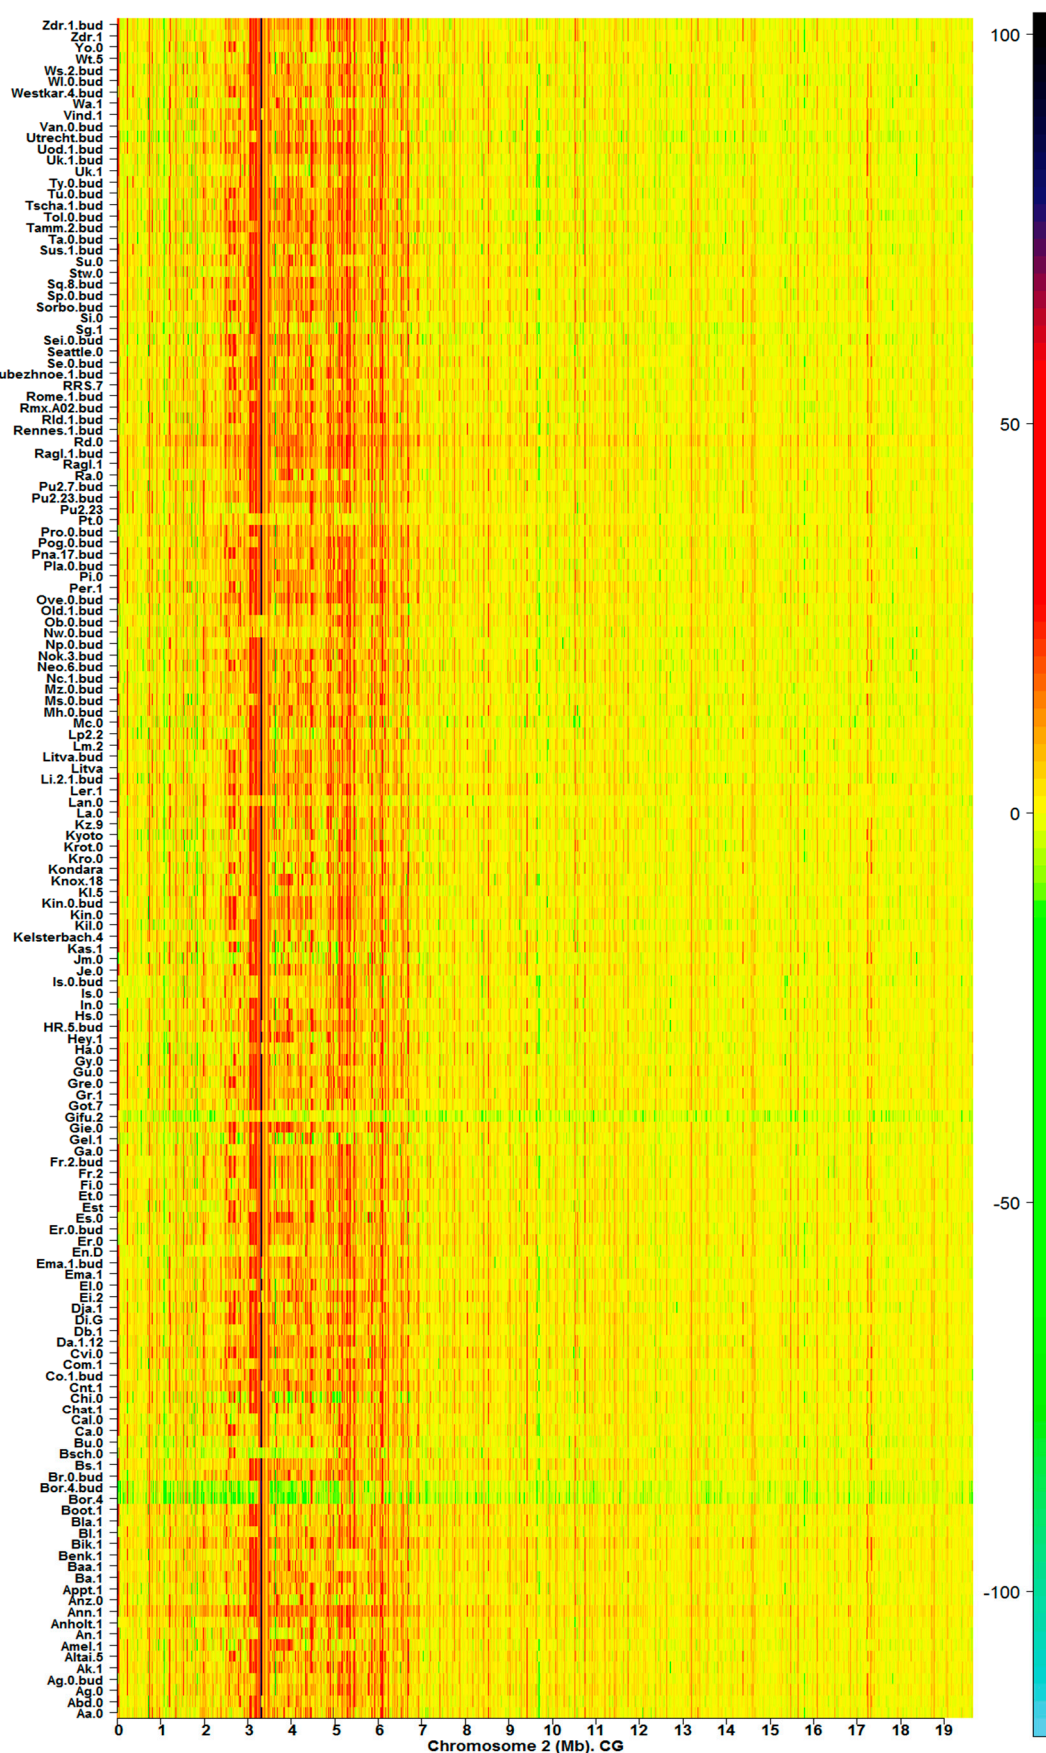

**Figure S2.** Heatmap of  $I_R$  for CG methylation context in chromosomes 2, built for the 151 *Arabidopsis thaliana* ecotypes [14]

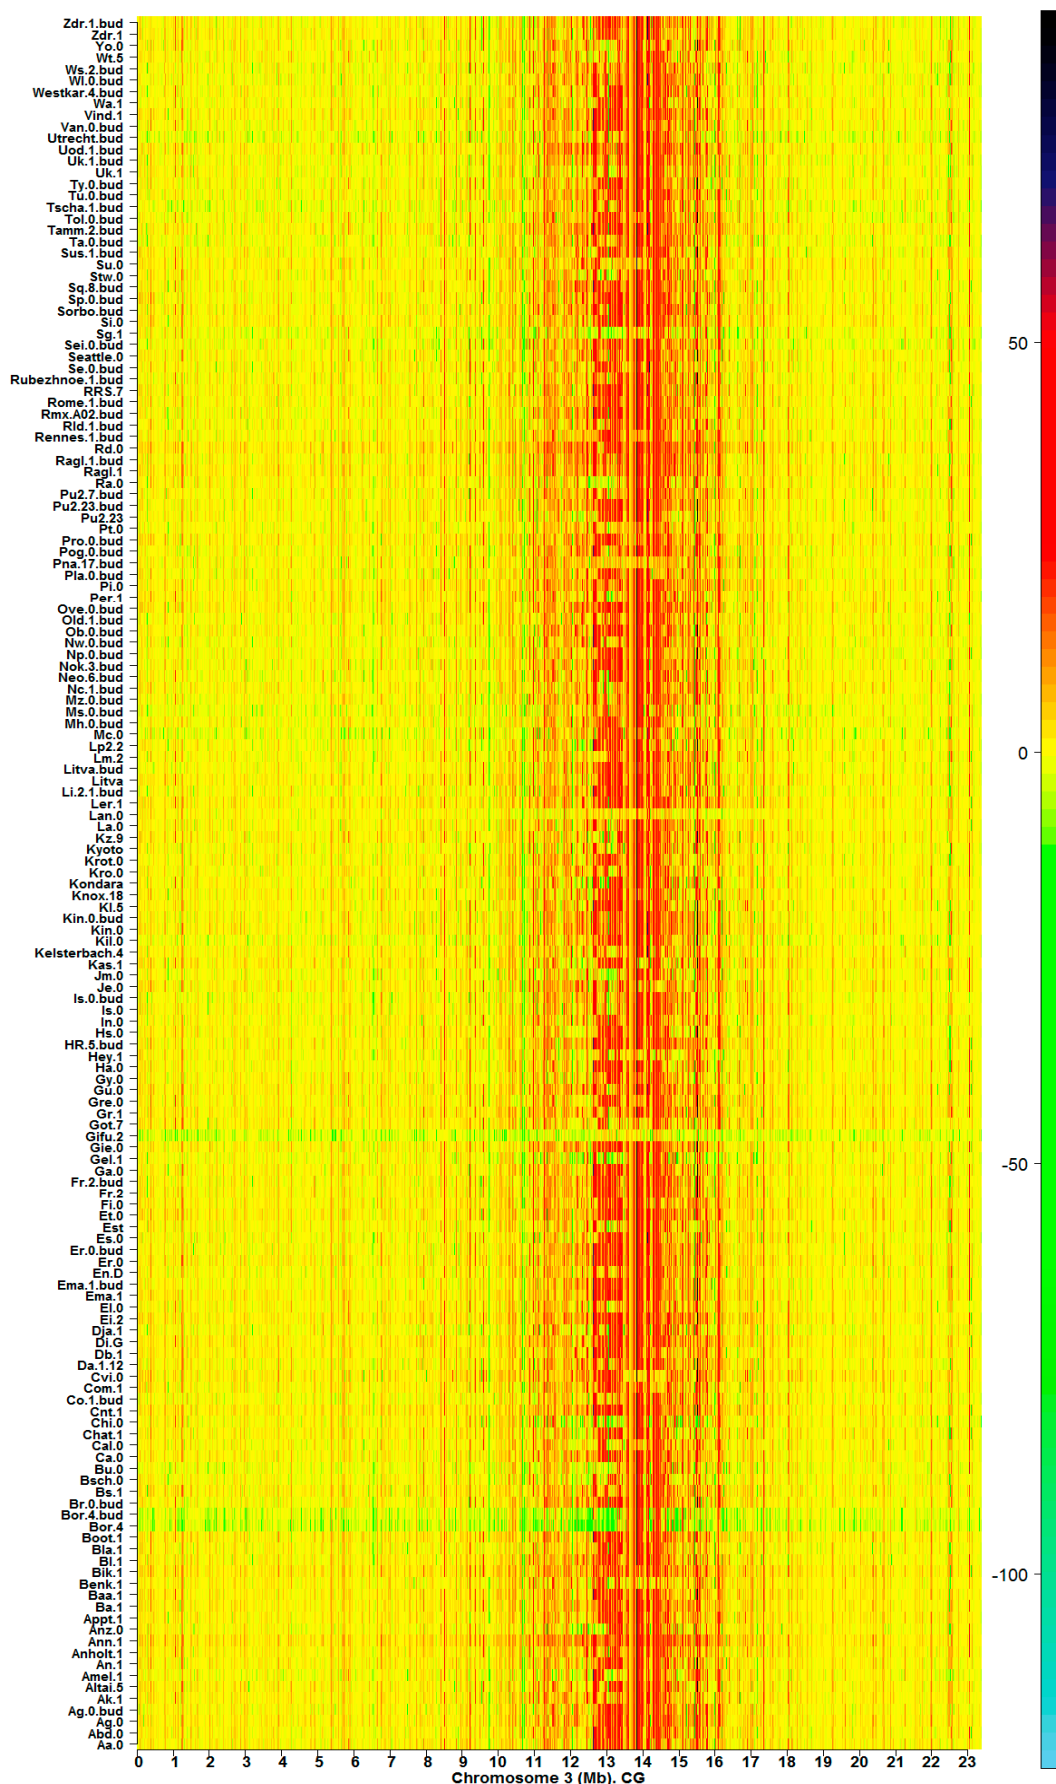

**Figure S3.** Heatmap of  $I_R$  for CG methylation context in chromosomes 3, built for the 151 *Arabidopsis thaliana* ecotypes [14]

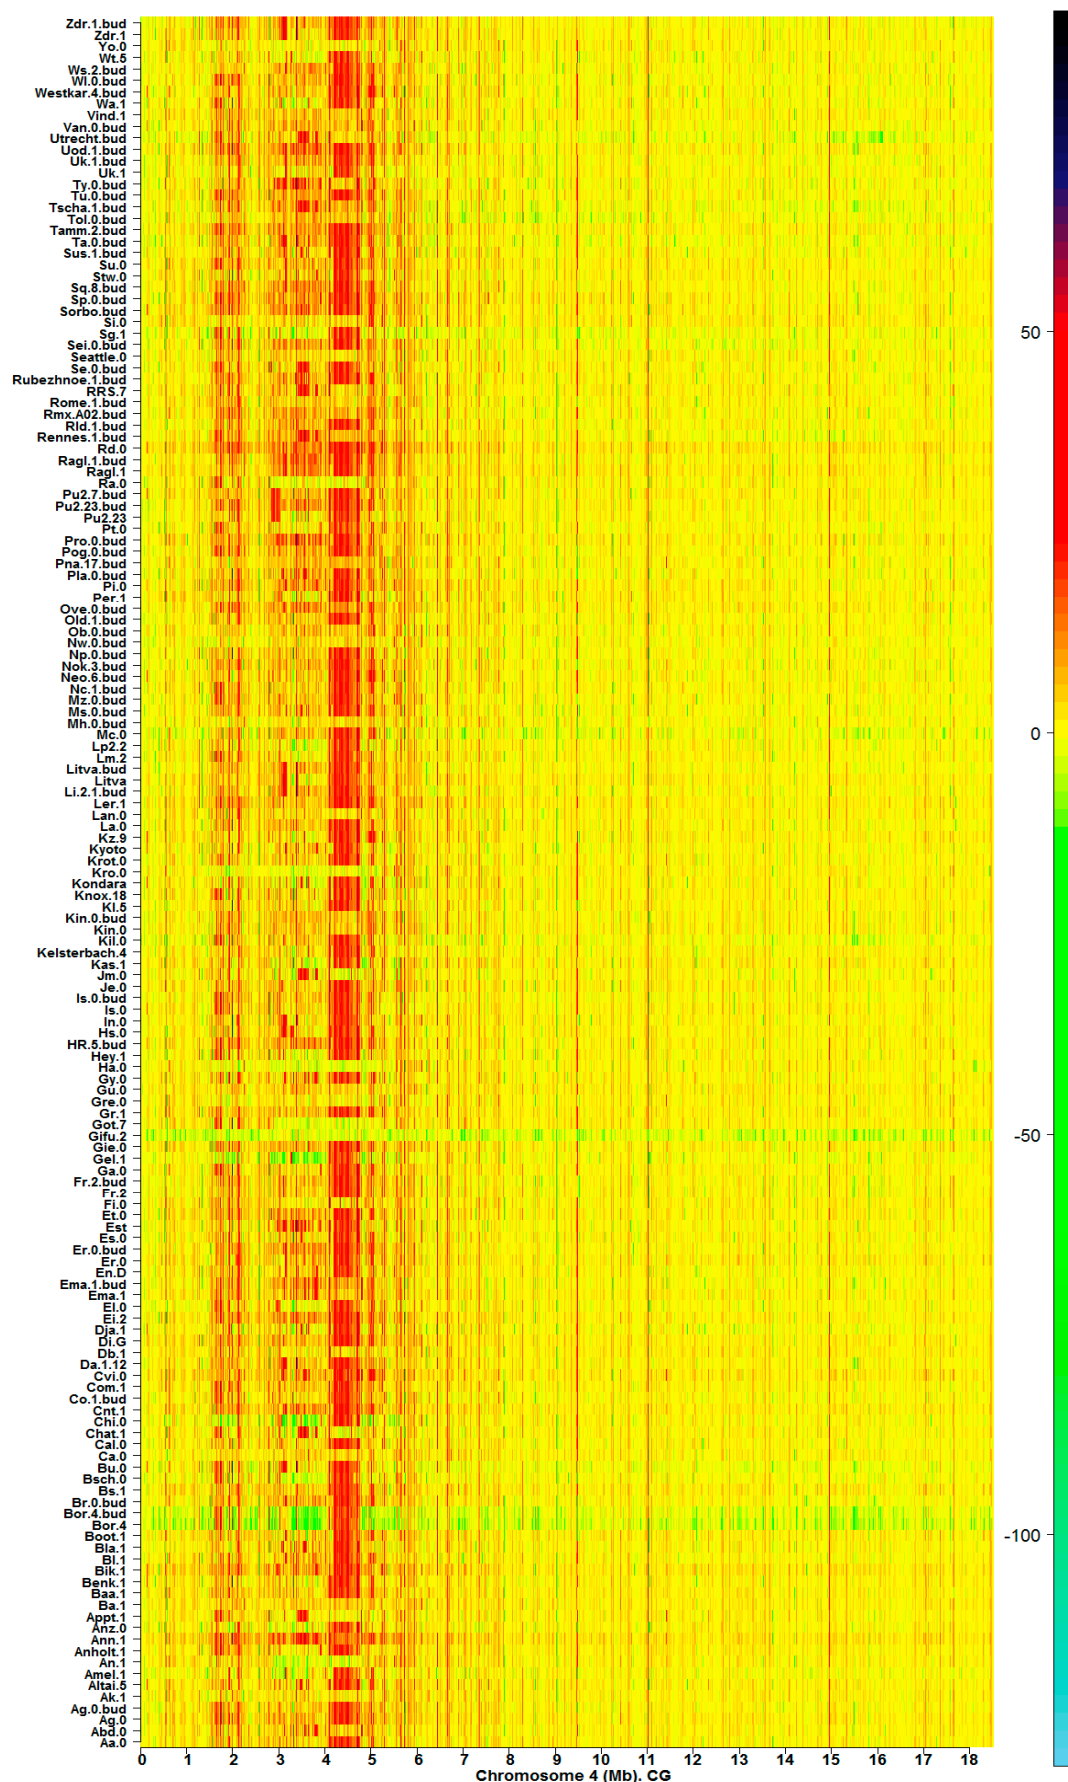

**Figure S4.** Heatmap of  $I_R$  for CG methylation context in chromosomes 4, built for the 151 *Arabidopsis thaliana* ecotypes [14]

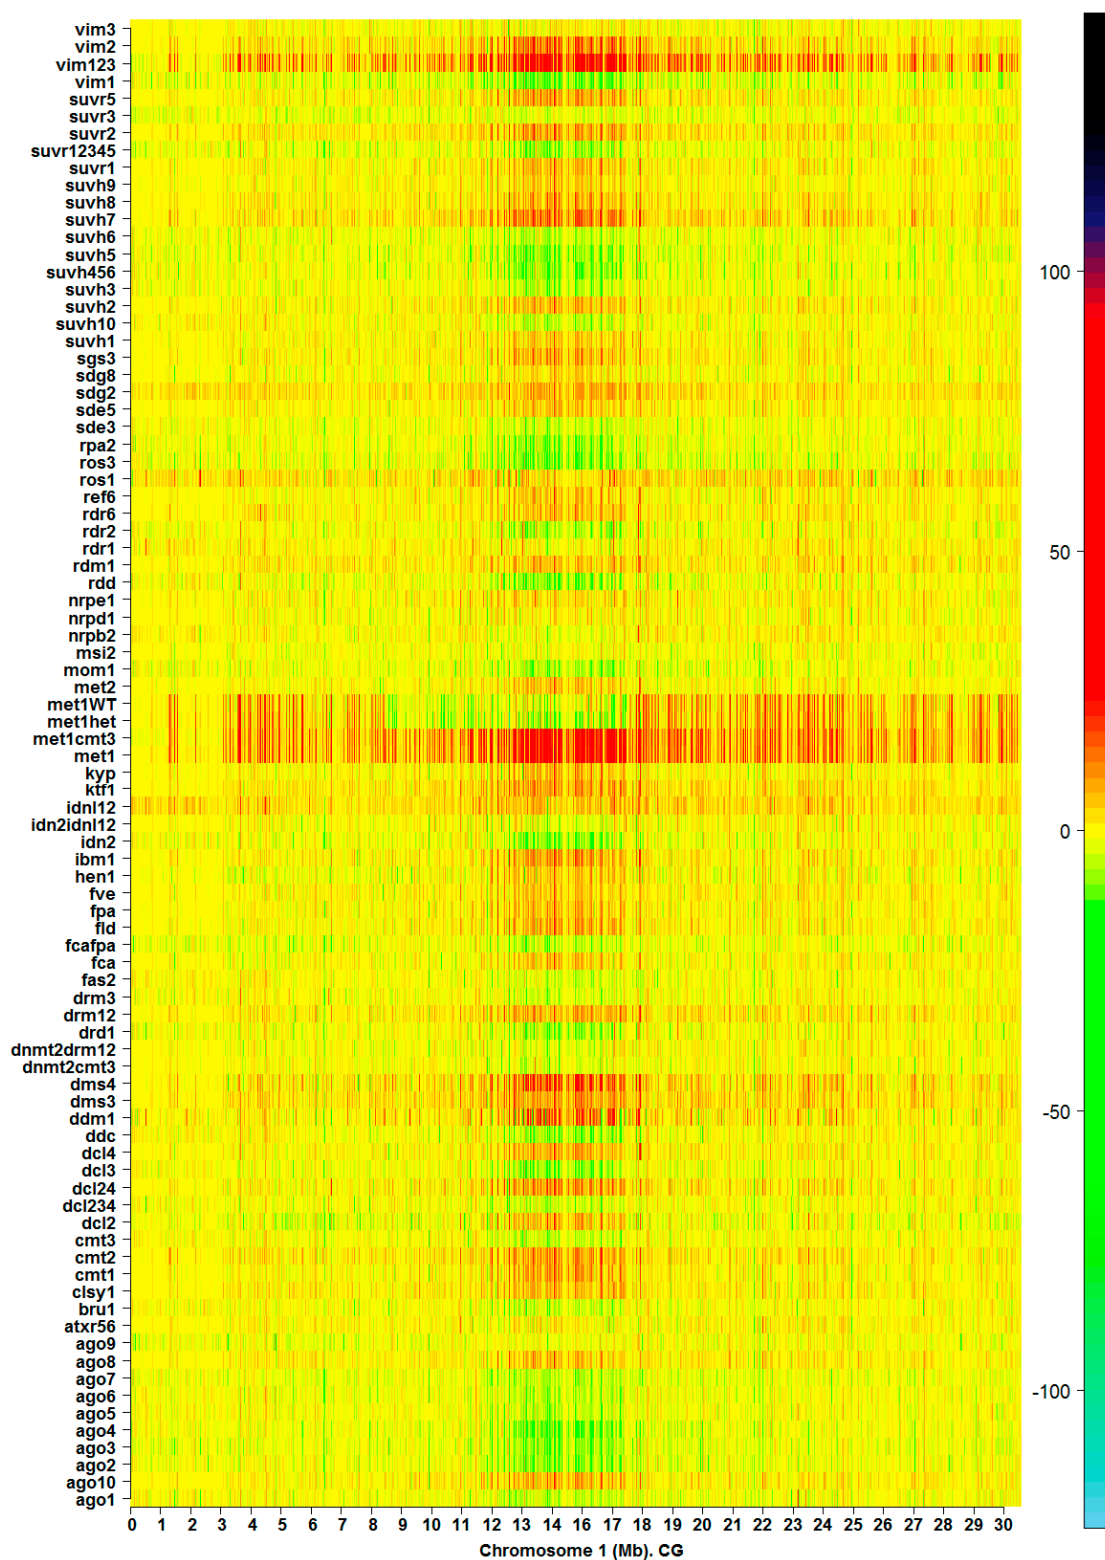

**Figure S5.** Heatmap of  $I_R$  for CG methylation context in chromosomes 1 built for 85 silencing mutants in *Arabidopsis thaliana* [15].



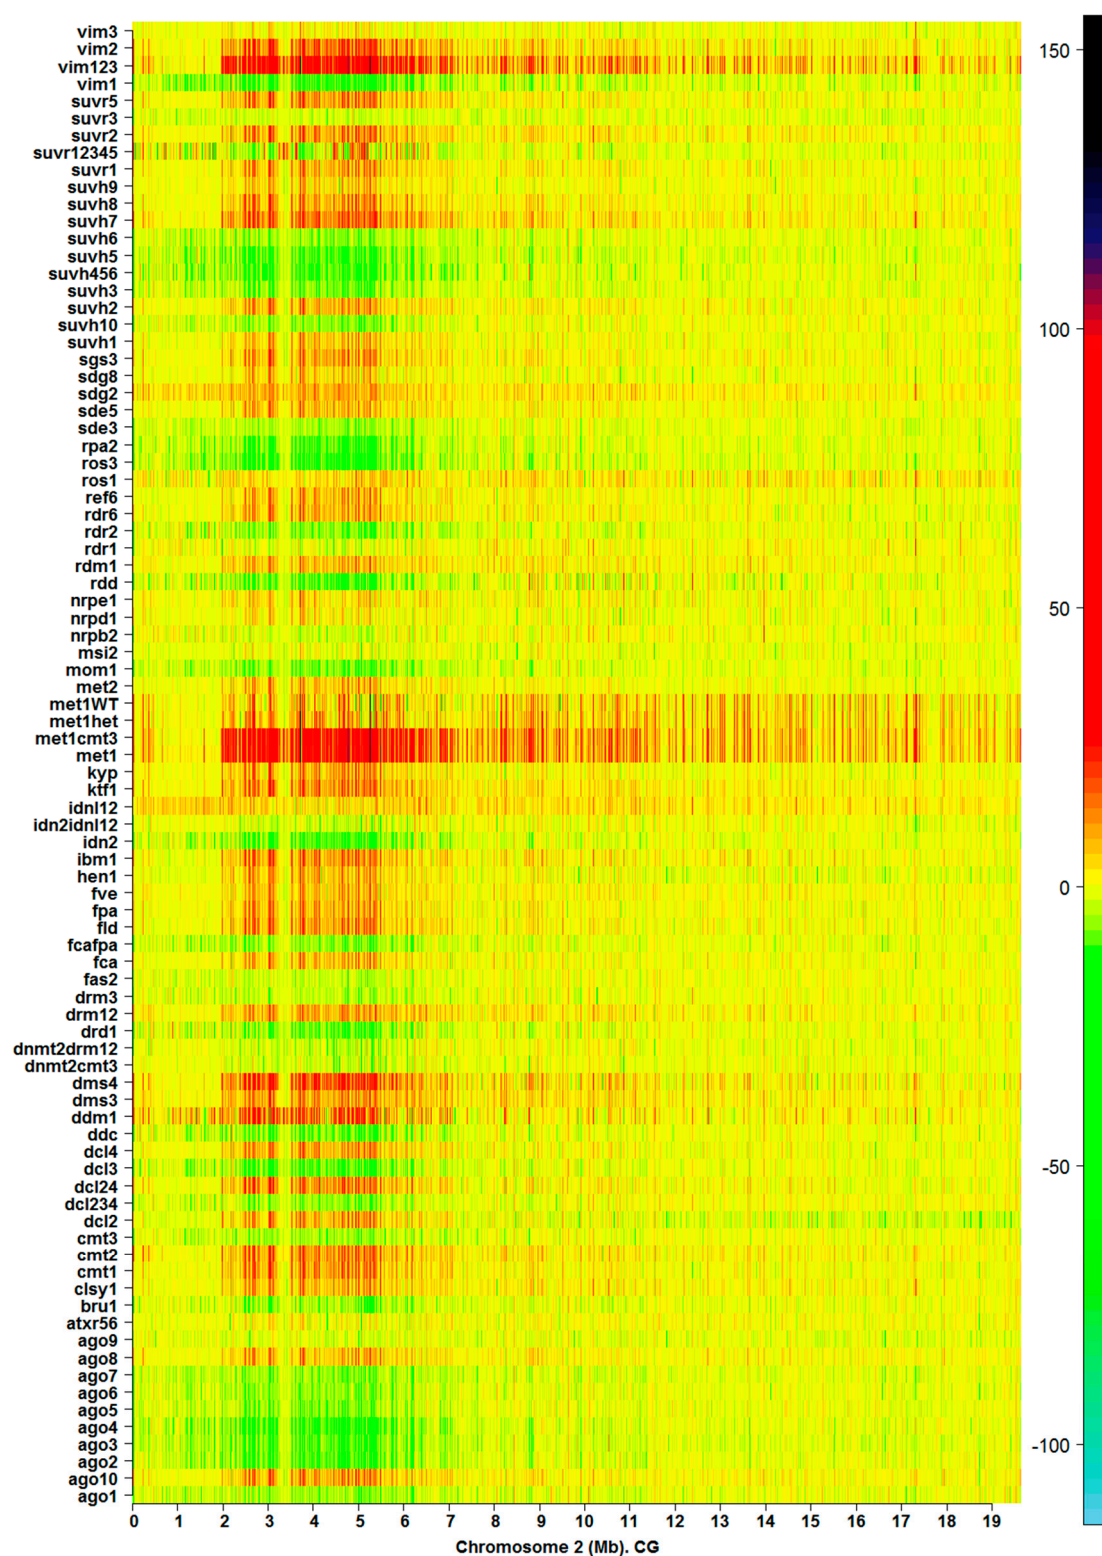

**Figure S6.** Heatmap of  $I_R$  for CG methylation context in chromosomes 2 built for 85 silencing mutants in *Arabidopsis thaliana* [15].

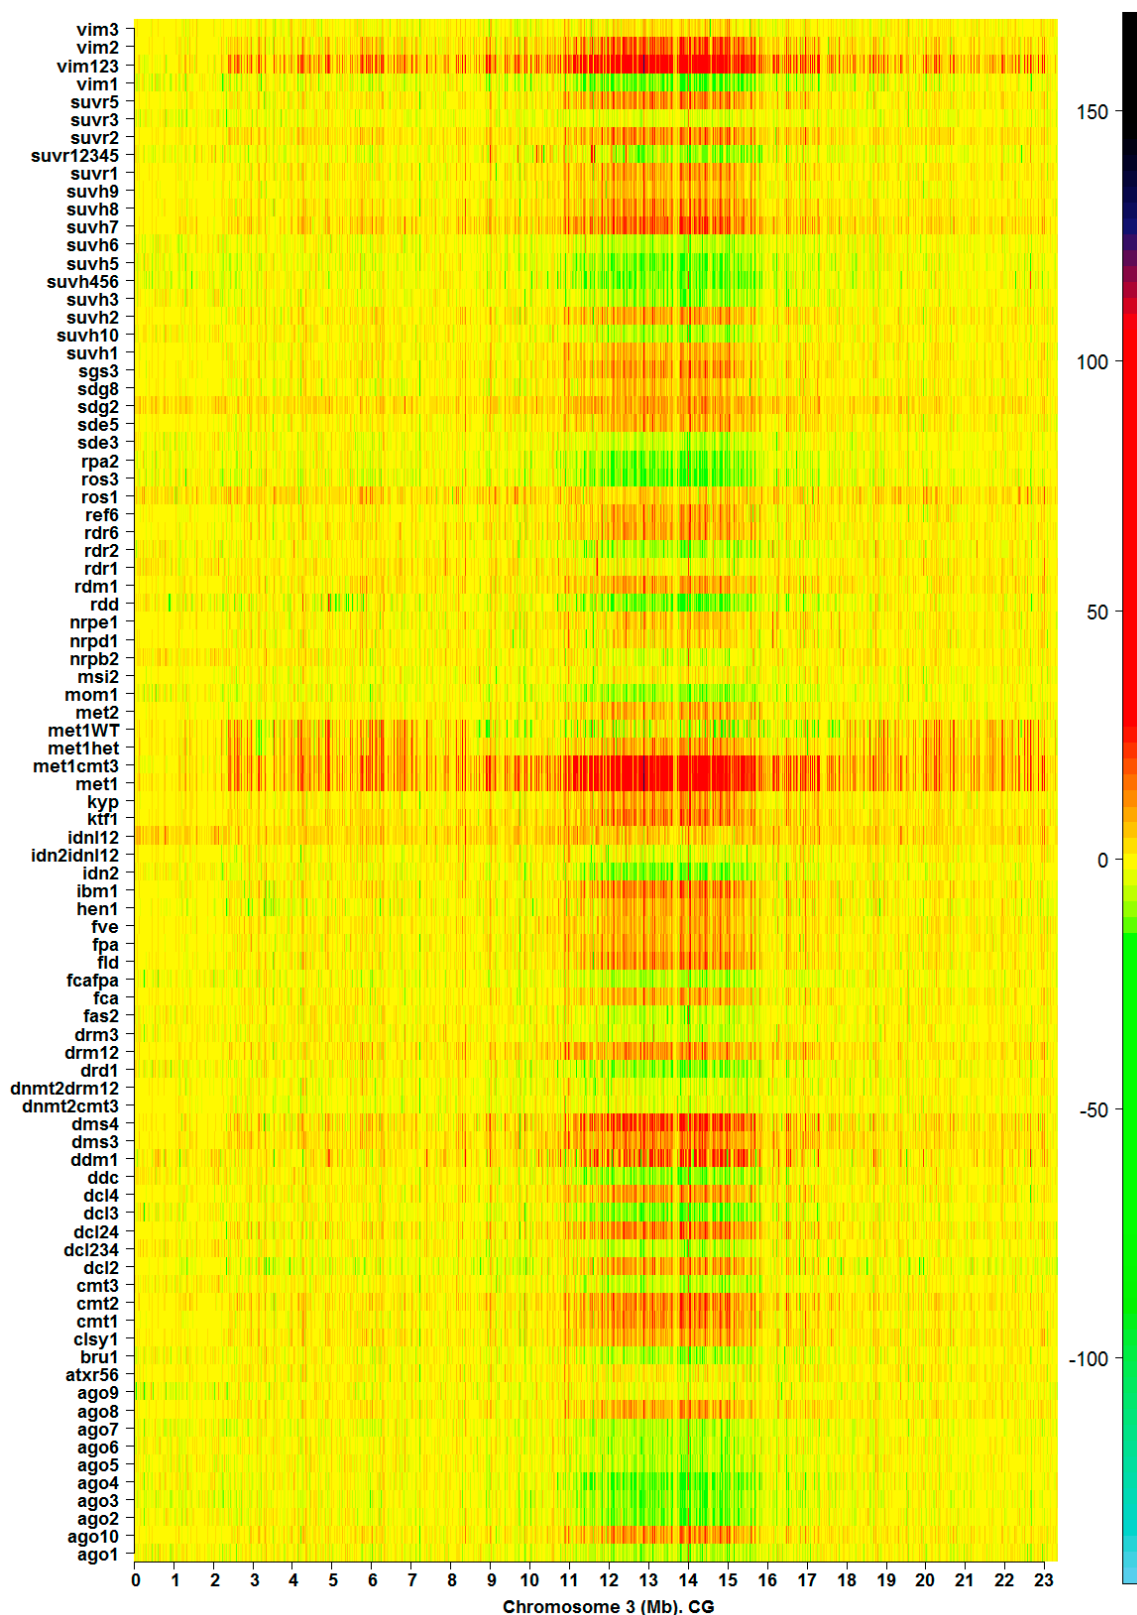

**Figure S7.** Heatmap of  $I_R$  for CG methylation context in chromosomes 3 built for 85 silencing mutants in *Arabidopsis thaliana* [15].

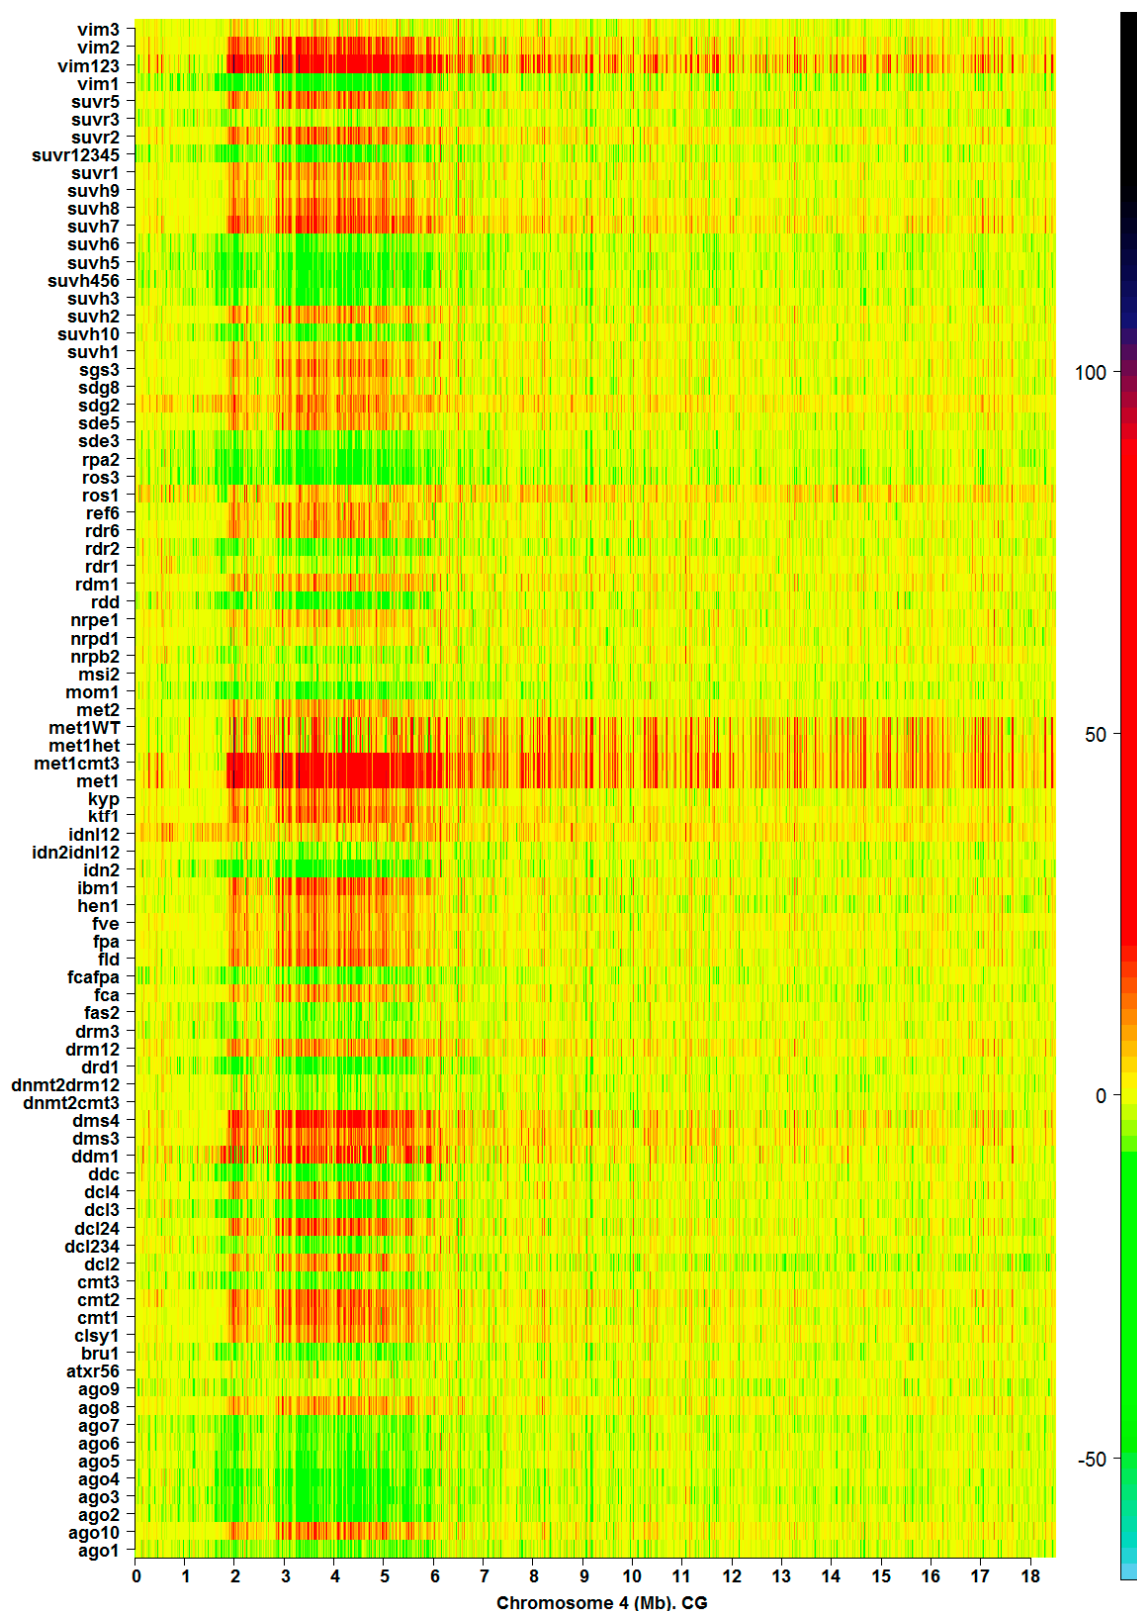

Figure S8. Heatmap of  $I_R$  for CG methylation context in chromosomes 4 built for 85 silencing mutants in *Arabidopsis thaliana* [15].



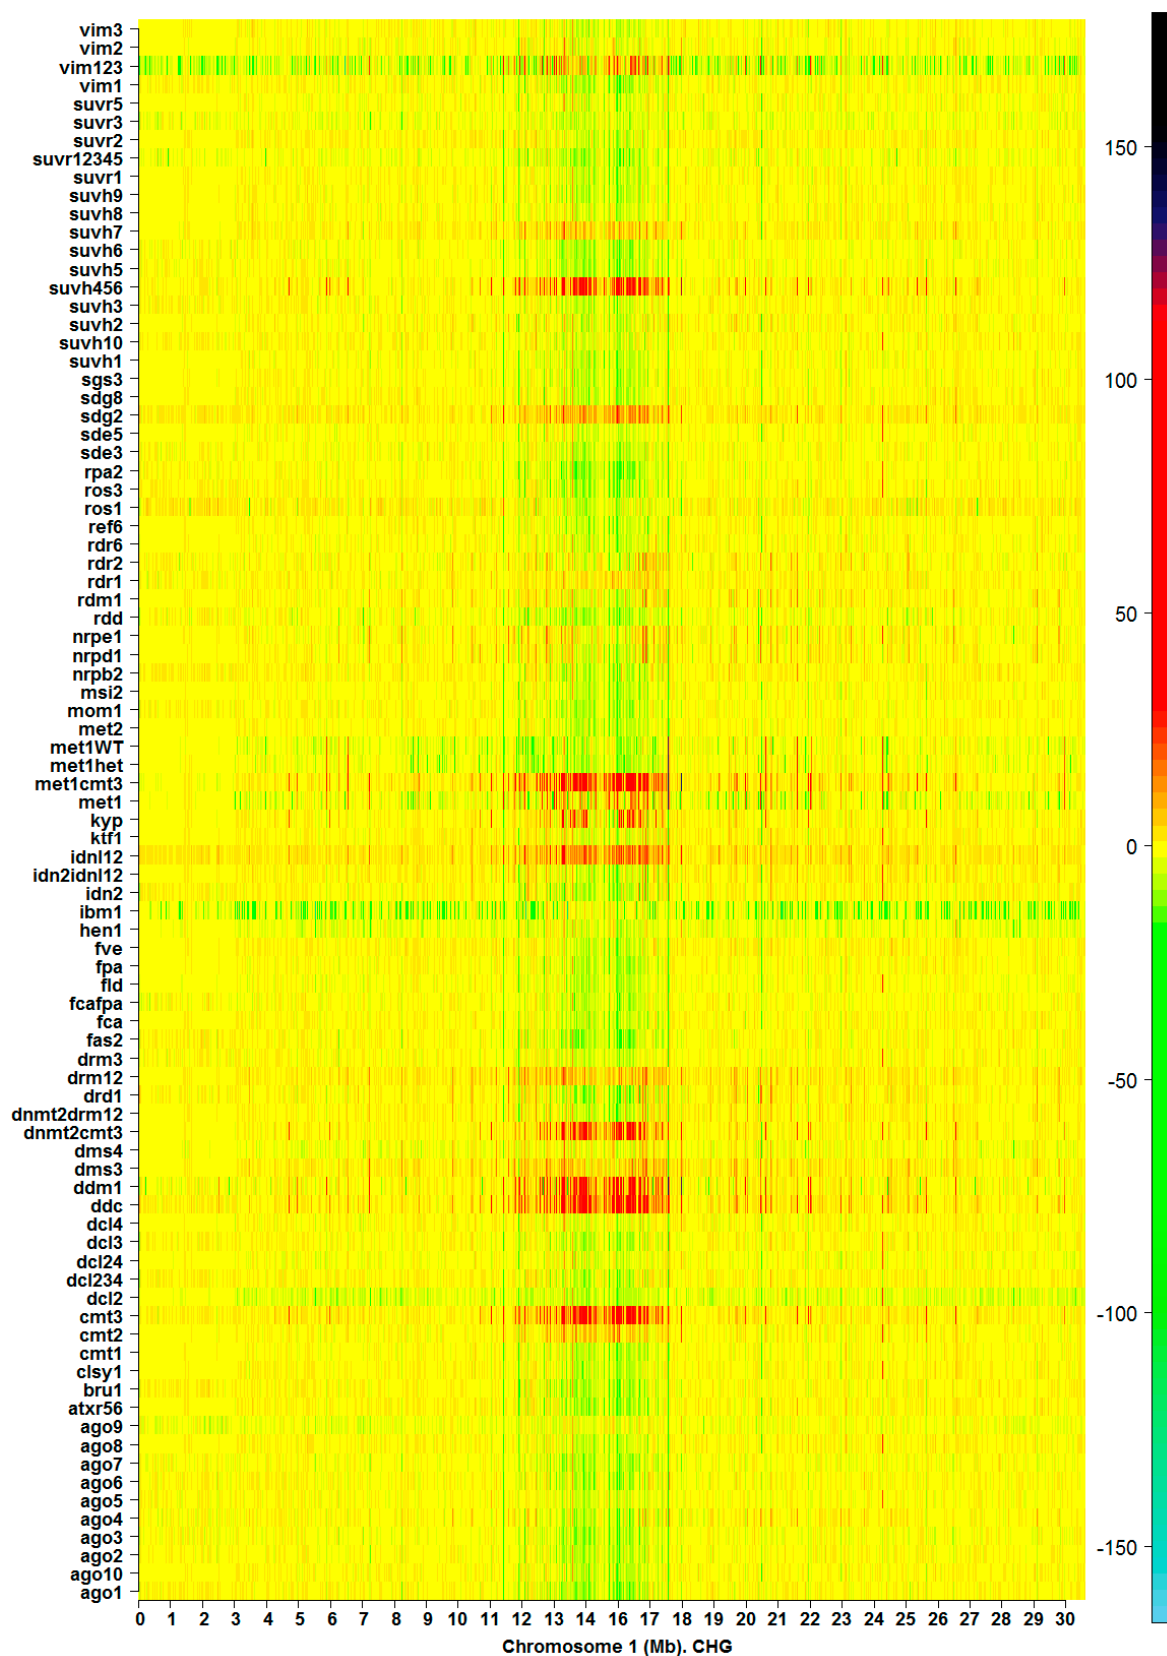

**Figure S9.** Heatmap of  $I_R$  for CHG methylation context in chromosome 1 built for the 85 silencing mutants [15].

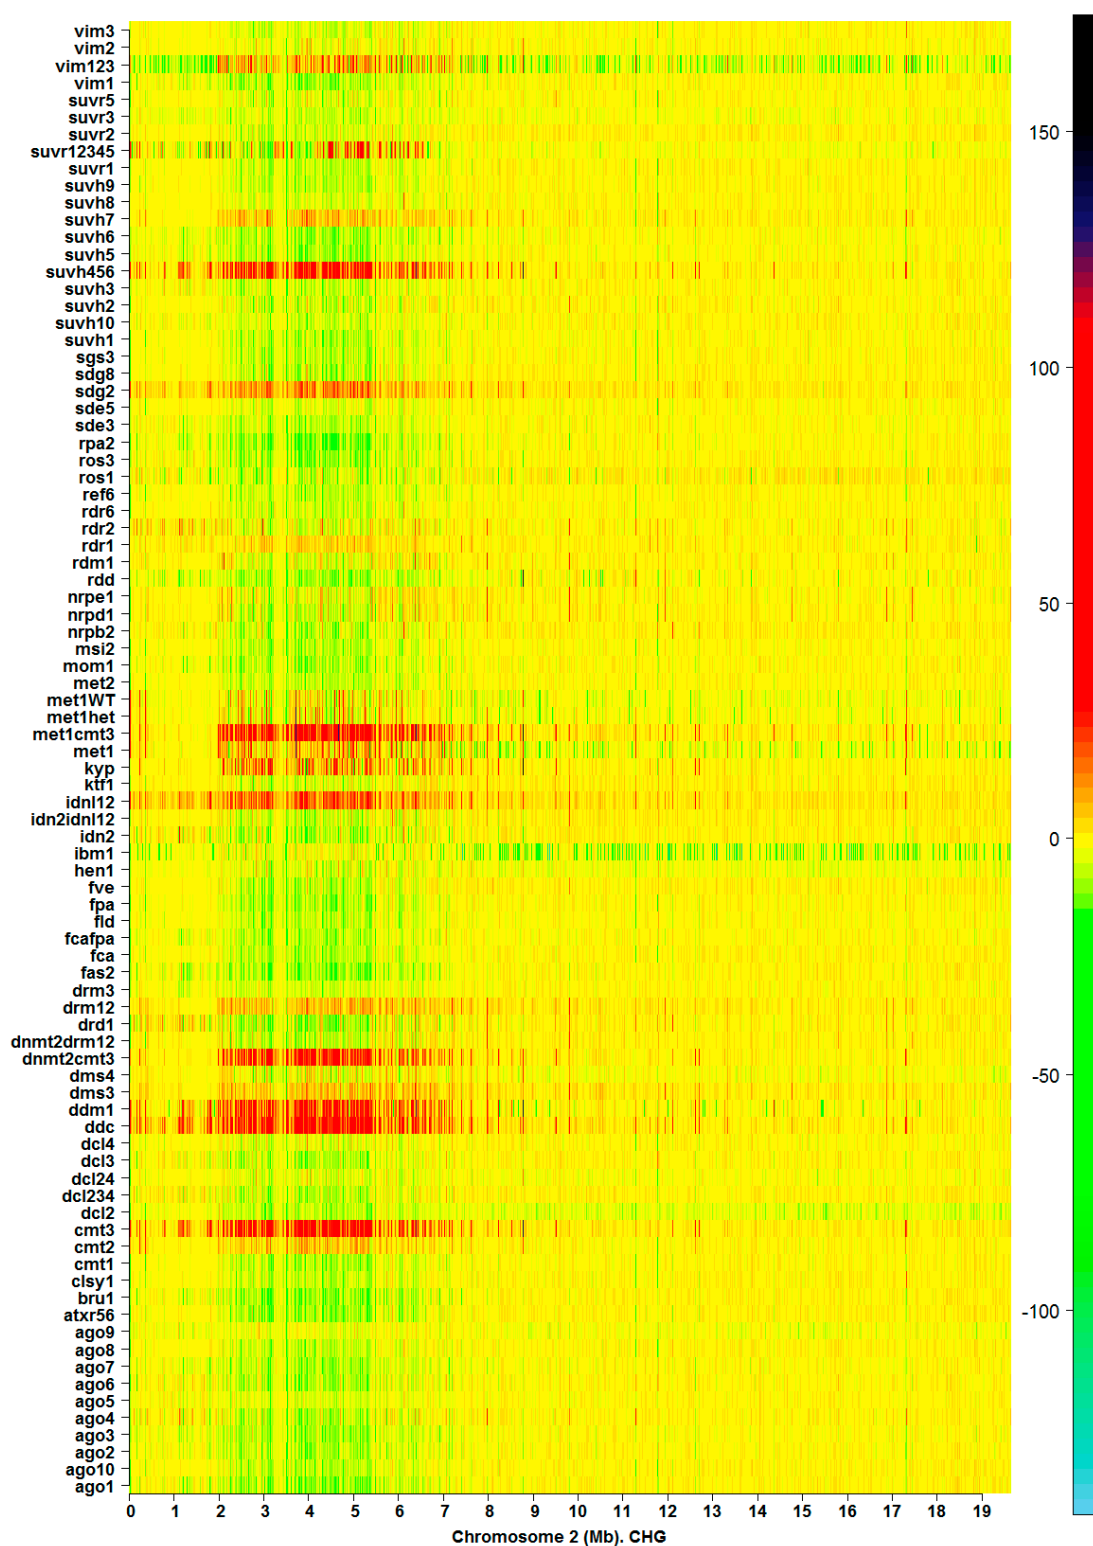

Figure S10. Heatmap of  $I_R$  for CHG methylation context in chromosome 2 built for the 85 silencing mutants [15].

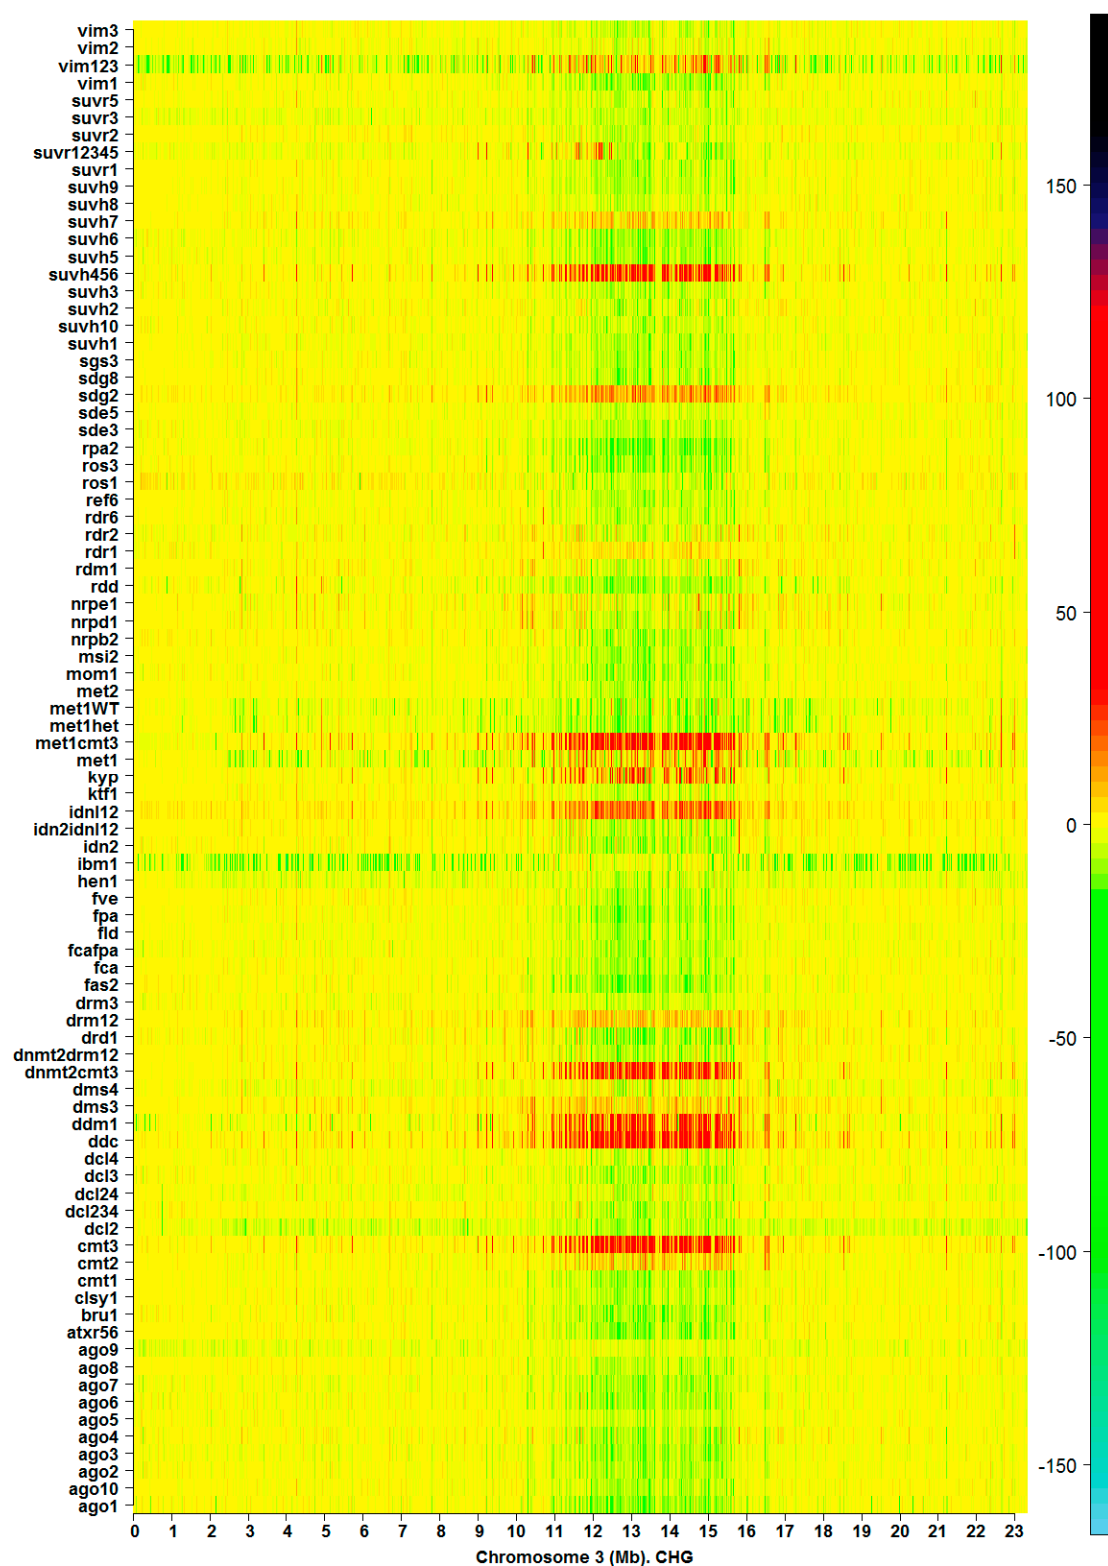

**Figure S11.** Heatmap of  $I_R$  for CHG methylation context in chromosome 3 built for the 85 silencing mutants [15].

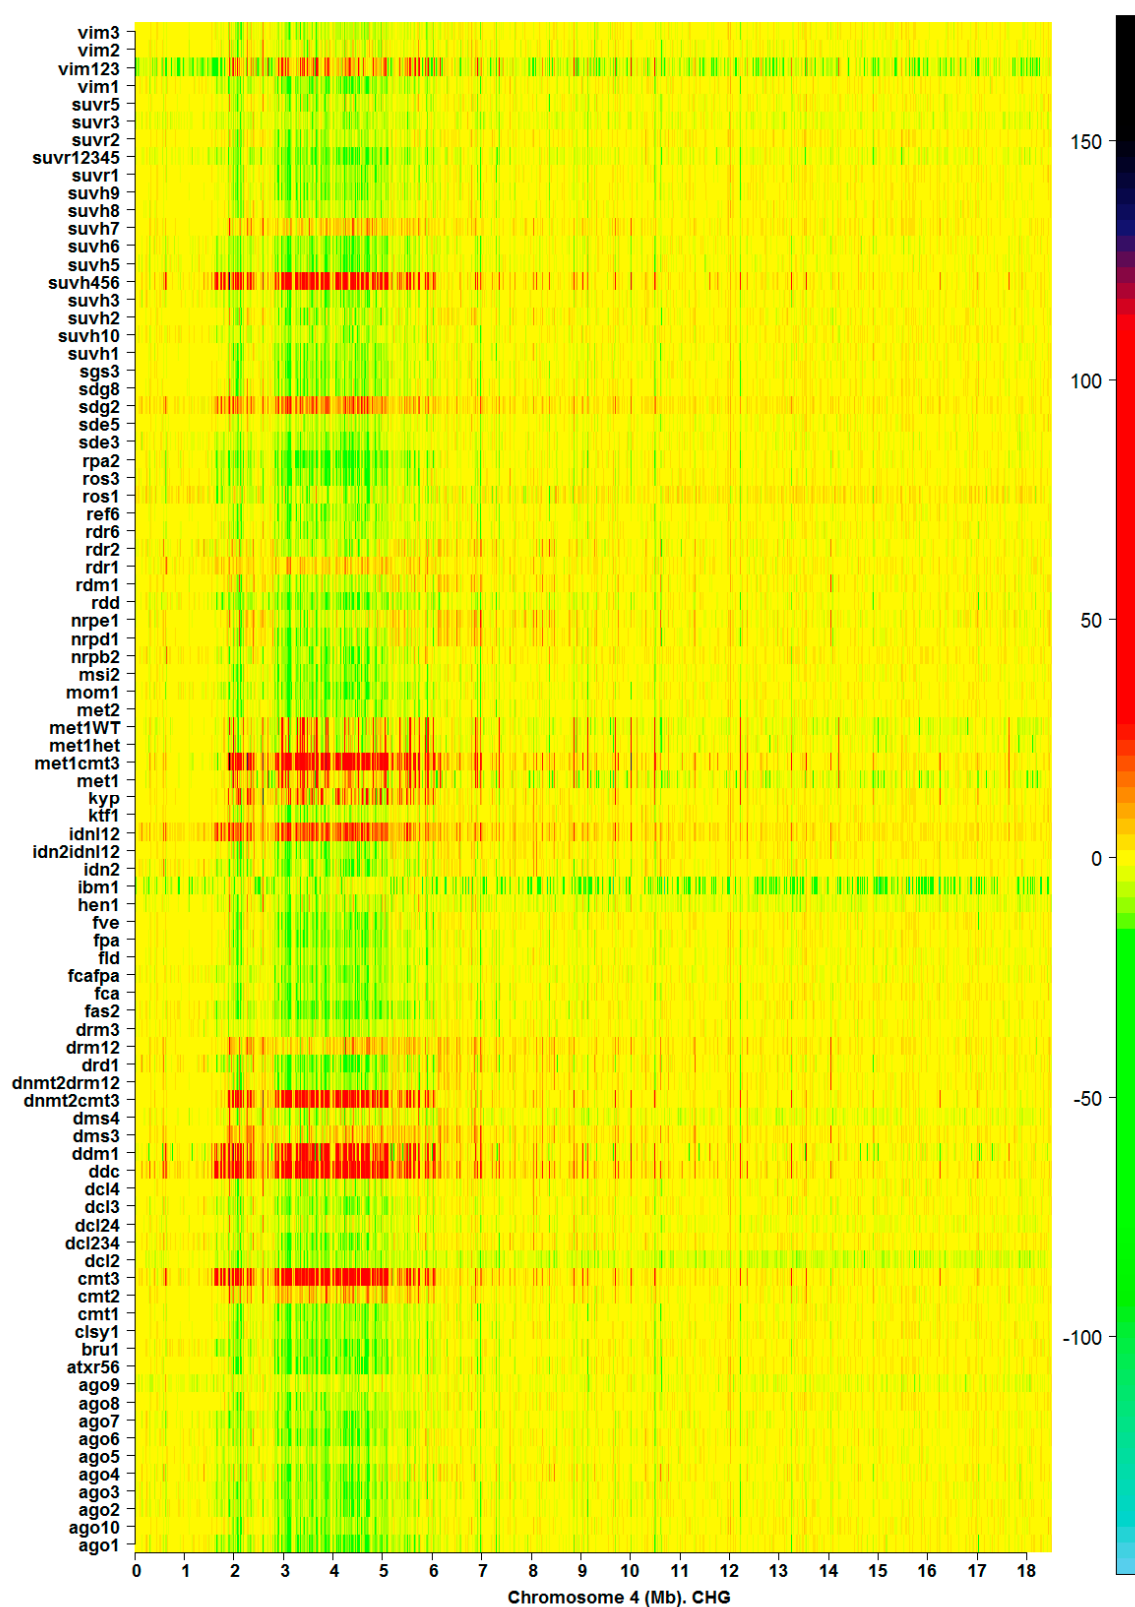

**Figure S12.** Heatmap of  $I_R$  for CHG methylation context in chromosome 4 built for the 85 silencing mutants [15].

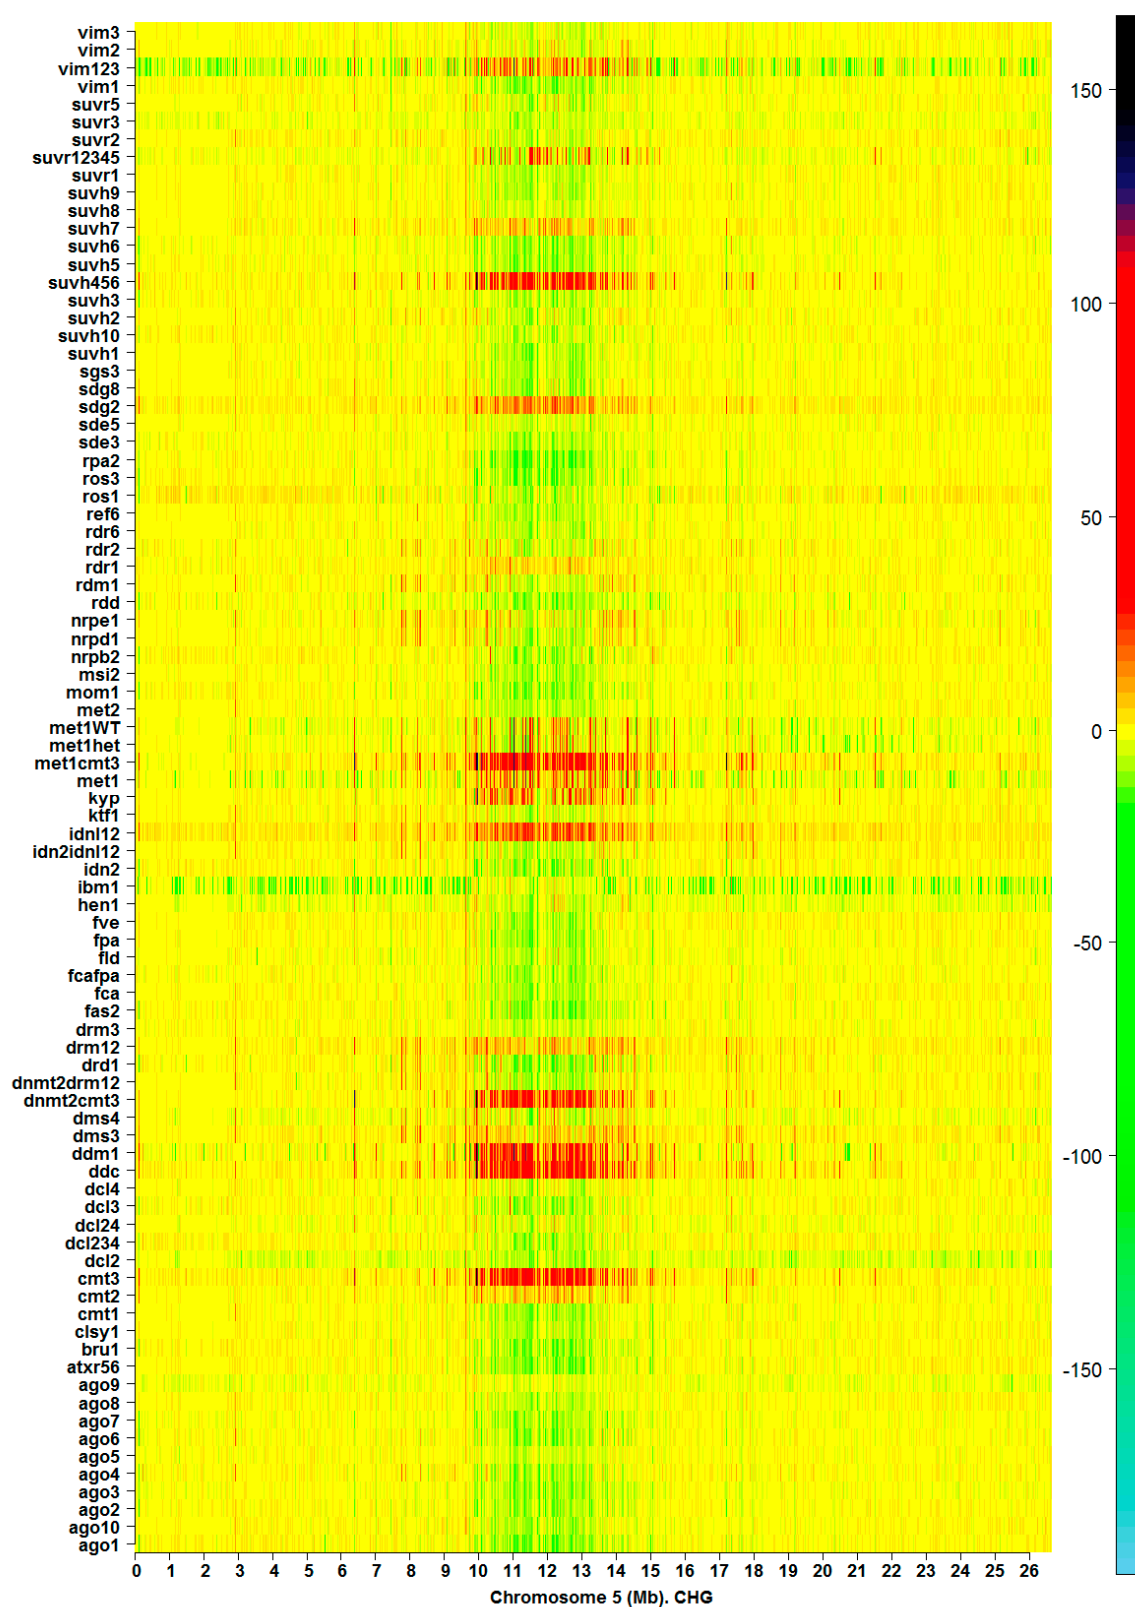

**Figure S13.** Heatmap of  $I_R$  for CHG methylation context in chromosome 5 built for the 85 silencing mutants [15].

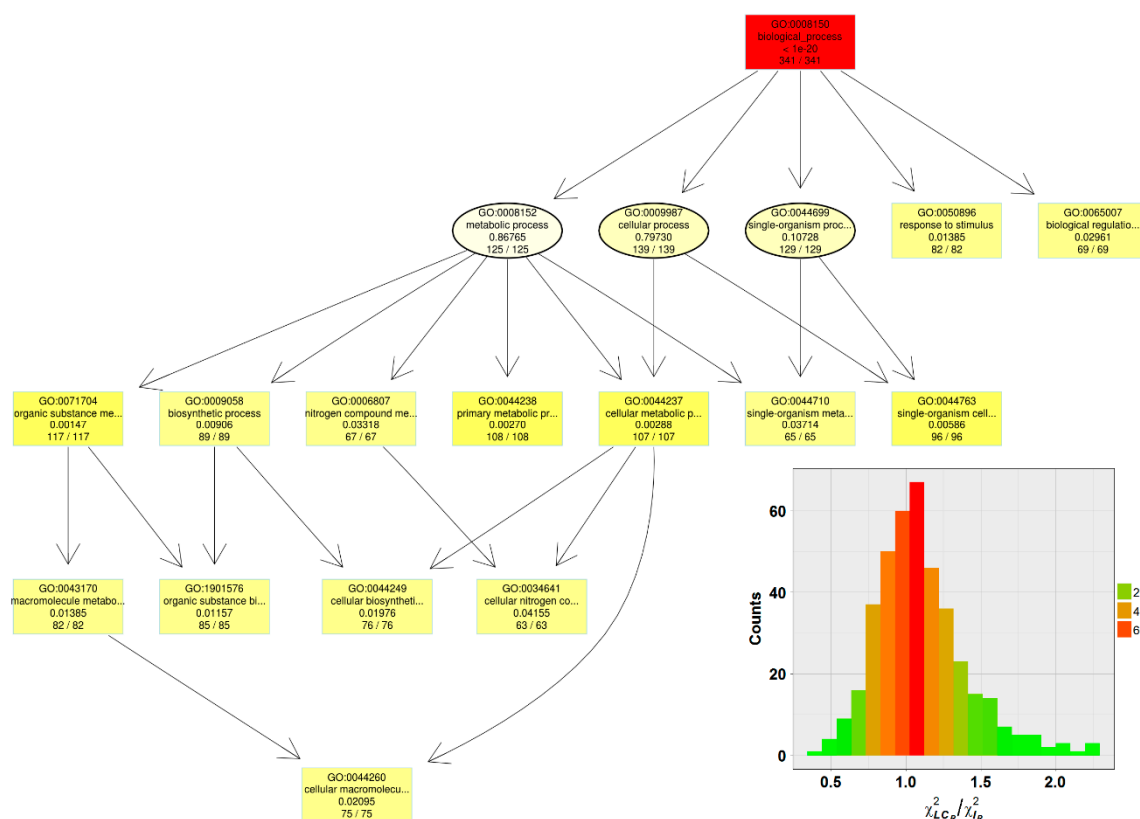

**Figure S14.** GO enrichment analysis of the genes within the selected GFs based on Chi-square statistics. The significant nodes are represented as rectangles and only the subgraph induced by the first 15 significant nodes is shown. The subplot shows the distribution of the rate  $\chi^2_{LCR} / \chi^2_{IR}$  of the Chi-squared statistics estimated for GFs selected where the 477 annotated protein-code genes are located. The bootstrap Kolmogorov–Smirnov test does not reject normality rate  $\chi^2_{LCR} / \chi^2_{IR}$  and a Student’s *t*-test indicates that the mean is significantly greater than 1 (although quantitatively not too much greater than 1, since the expected mean inferred for this population is around 1.1).



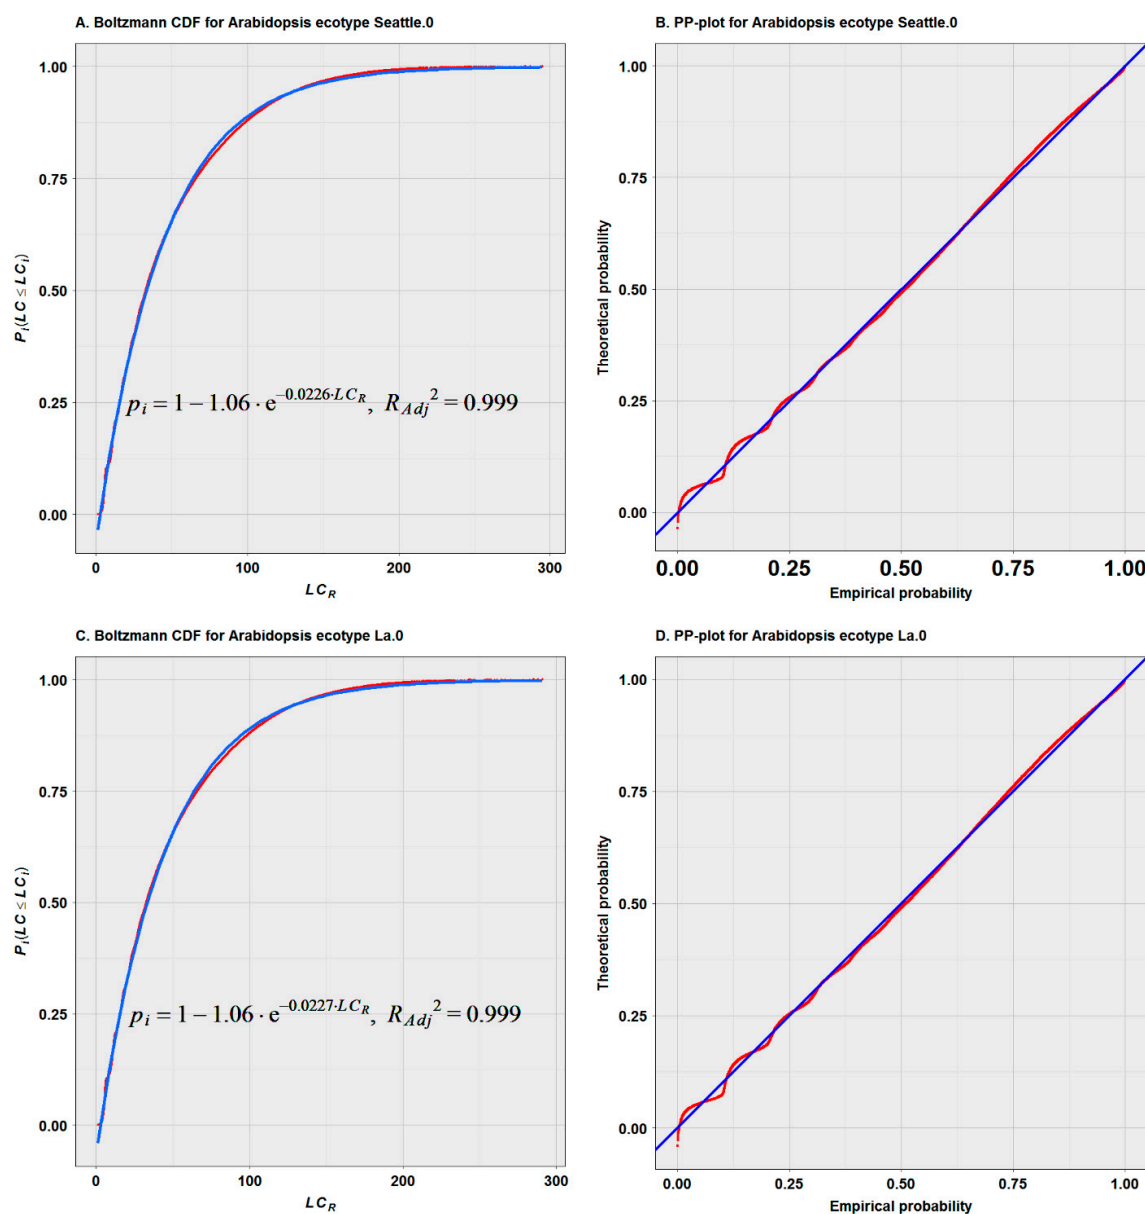

**Figure S15.** Non-linear regression fit of Equation (4) for *Arabidopsis* ecotypes Seattle.0 and La.0. (A); CDF and PP-plot *Arabidopsis* ecotype Seattle.0. (B,C); CDF and PP-plot *Arabidopsis* ecotype La.0. (D). In panels A and C, the blue and red lines denote the fitted and experimental probability values, respectively; In panels B and D, the red lines correspond to the graph: theoretical probability ( $y$ ) versus empirical probability ( $x$ ), and the blue lines are only the reference straight line  $x = y$ , which correspond to the ideal/perfect fit.

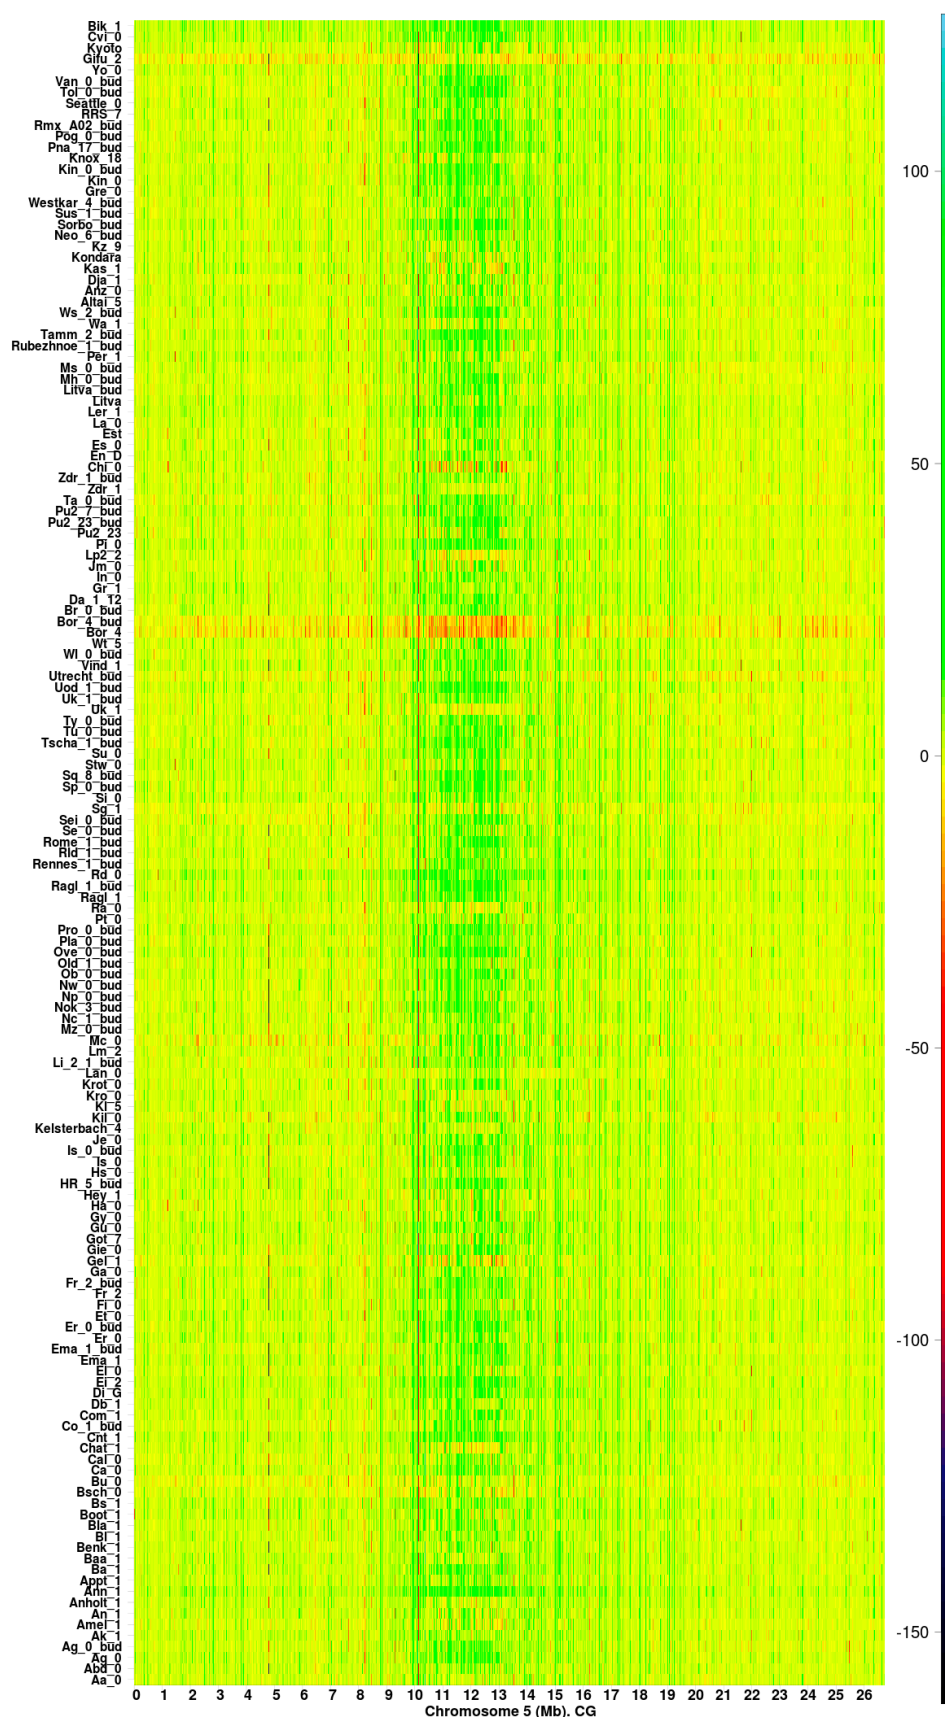

**Figure S16.** Heatmap for  $I_R$  in the CG methylation context along chromosome 5 from 151 *Arabidopsis thaliana* ecotypes. The samples are the same as in Figure 1, but with an inverted color scale equivalent to a photographic negative; the maximum and minimum correspond to sky blue and black, respectively.
